# Supplementary material for: Distinct patterns of somatic alterations in a lymphoblastoid and a tumor genome derived from the same individual
Source: PubMed Central journal article supplement — Nucleic Acids Res. 2011 Apr 14;39(14):6056–68. doi: 10.1093/nar/gkr221 (PMC3152357; doi:10.1093/nar/gkr221), 2011-04-14
Supplement: supp_gkr221_Additional_File2_new.pdf [file supp_gkr221_Additional_File2_new.pdf]

**Structural variations in HCC1954.** Genomic coordinates of all structural variations found in HCC1954 genome, strand of the sequences and genes in the structural variation regions. Genomic coordinates are indexed to the reference genome sequence NCBI 36.1 / hg18.

**Interchromosomal rearrangements.**

CHR12:39622580-39622666 (+) [CNTN1] <=> CHR20:57868850-57868926 (-) [SYCP2]  
CHR15:29158557-29158648 (+) [TRPM1] <=> CHR20:59346861-59346978 (-) [CDH4]  
CHR1:26328554-26328561 (+) [PDIK1L] <=> CHR13:26931719-26931740 (-) [MTIF3]  
CHR1:9043932-9043970 (+) [SLC2A5] <=> CHR14:92782818-92782879 (+) [BTBD7]  
CHR1:26328553-26328561 (-) [PDIK1L] <=> CHR14:87307435-87307535 (+) [NoGene]  
CHR1:107915031-107915083 (-) [VAV3] <=> CHR2:229753752-229753817 (+) [PID1]  
CHR1:4569314-4569380 (-) [NoGene] <=> CHR3:136499354-136499384 (-) [NoGene]  
CHR1:91625474-91625492 (-) [HFM1] <=> CHR4:77026212-77026219 (-) [PPEF2]  
CHR1:107914608-107914624 (+) [VAV3] <=> CHR5:71182496-71182513 (+) [NoGene]  
CHR2:132729300-132729330 (+) [NoGene] <=> CHR16:33870711-33870781 (+) [NoGene]  
CHR2:132733241-132733259 (+) [NoGene] <=> CHR16:33868618-33868646 (+) [NoGene]  
CHR2:132749517-132749526 (+) [NoGene] <=> CHR16:14488415-14488451 (-) [PARN]  
CHR2:132733796-132733837 (+) [NoGene] <=> CHR17:42621517-42621527 (+) [CDC27]  
CHR2:132735241-132735246 (+) [NoGene] <=> CHR17:42604314-42604325 (+) [CDC27]  
CHR2:132749837-132750010 (+) [NoGene] <=> CHR24:136348069-136348187 (-) [NoGene]  
CHR2:132754595-132754650 (+) [NoGene] <=> CHR5:71182614-71182644 (+) [NoGene]  
CHR3:137710402-137710405 (+) [STAG1] <=> CHR16:33857818-33857831 (+) [NoGene]  
CHR5:1455040-1455111 (+) [SLC6A3] <=> CHR8:112664974-112665055 (-) [NoGene]  
CHR5:1610815-1610939 (+) [NoGene] <=> CHR8:114686584-114686649 (+) [NoGene]  
CHR5:2027278-2027353 (+) [NoGene] <=> CHR8:107324418-107324514 (+) [NoGene]  
CHR5:3262085-3262180 (+) [NoGene] <=> CHR8:119873668-119873810 (+) [NoGene]  
CHR5:114843636-114843723 (+) [NoGene] <=> CHR8:131470258-131470383 (-) [NoGene]  
CHR5:114846618-114846691 (+) [NoGene] <=> CHR8:131509317-131509416 (+) [NoGene]  
CHR5:114882837-114882902 (+) [FEM1C] <=> CHR8:131462904-131462996 (+) [NoGene]  
CHR5:115177922-115178010 (-) [CDO1] <=> CHR8:129279291-129279403 (+) [NoGene]  
CHR5:115180478-115180559 (+) [CDO1] <=> CHR8:130950225-130950287 (-) [FAM49B]  
CHR5:116868566-116868647 (-) [NoGene] <=> CHR8:109290109-109290257 (-) [EIF3E]  
CHR5:175115077-175115108 (+) [NoGene] <=> CHR8:117580286-117580304 (+) [NoGene]  
CHR5:176308950-176309019 (+) [UIMC1] <=> CHR8:126109549-126109625 (+) [SQLE]  
CHR5:176387847-176387908 (-) [ZNF346] <=> CHR8:127991842-127991921 (+) [NoGene]  
CHR5:176458228-176458383 (+) [FGFR4] <=> CHR8:131950751-131950844 (-) [ADCY8]  
CHR5:176598995-176599071 (+) [NSD1] <=> CHR8:129272516-129272603 (+) [NoGene]  
CHR5:179367610-179367716 (+) [RNF130] <=> CHR8:107902732-107902814 (+) [NoGene]  
CHR5:179373840-179373929 (-) [RNF130] <=> CHR8:129277658-129277744 (+) [NoGene]  
CHR5:179381598-179381664 (+) [RNF130] <=> CHR8:107905524-107905576 (+) [NoGene]  
CHR5:179386176-179386261 (+) [RNF130] <=> CHR8:130934181-130934279 (+) [FAM49B]  
CHR5:179441156-179441262 (-) [RNF130] <=> CHR8:129271032-129271110 (+) [NoGene]  
CHR5:180392979-180393074 (-) [BTNL9] <=> CHR8:119282275-119282389 (-) [SAMD12]  
CHR5:180408238-180408304 (-) [BTNL9] <=> CHR8:129286009-129286110 (-) [NoGene]  
CHR5:180602102-180602236 (+) [GNB2L1] <=> CHR8:111592190-111592287 (-) [NoGene]  
CHR5:180601913-180602071 (-) [GNB2L1] <=> CHR8:112775975-112776121 (+) [NoGene]  
CHR5:180602061-180602128 (+) [GNB2L1] <=> CHR8:133281184-133281258 (+) [KCNQ3]  
CHR5:180603244-180603293 (-) [GNB2L1] <=> CHR8:111963108-111963225 (-) [NoGene]  
CHR5:180605070-180605155 (+) [GNB2L1] <=> CHR8:124967348-124967429 (+) [FER1L6]

CHR6:119600269-119600362 (+) [MAN1A1] <=> CHR8:82917210-82917323 (+) [SNX16]  
CHR8:39416759-39416795 (+) [NoGene] <=> CHR11:69629641-69629762 (-) [ANO1]  
CHR8:39420687-39420753 (+) [NoGene] <=> CHR11:69630273-69630373 (+) [ANO1]  
CHR8:107684681-107684719 (-) [OXR1] <=> CHR11:68683507-68683574 (-) [NoGene]  
CHR8:130637454-130637533 (+) [NoGene] <=> CHR11:60028750-60028853 (+) [MS4A12]

#### Deletions.

CHR1: 156993554-156994630  
CHR1: 208001923-208002563  
CHR2: 134977150-134978340  
CHR2: 151749445-151749734  
CHR4: 67948809-67949056  
CHR5: 1096457-1096751  
CHR5: 1097808-1099831  
CHR5: 1189580-1189728  
CHR5: 1223335-1223870  
CHR5: 12239497-12239791  
CHR5: 20054659-20054966  
CHR6: 31445832-31449951  
CHR8: 100136070-100144101  
CHR8: 108648681-108648862  
CHR8: 129282242-129285997  
CHR8: 98269324-98269661  
CHR9: 135853422-135853796  
CHR9: 13953776-13955077  
CHR9: 139892447-139893323  
CHR10: 130071031-130071255  
CHR11: 102107033-102107266  
CHR14: 90109500-90109672  
CHR17: 60702538-60702850  
CHR19: 3945559-3945905  
CHR20: 59418861-59419036  
CHR21: 36597977-36598205

#### Inversions.

CHR5: 1379418-114852972  
CHR5: 175113225-175147686  
CHR8: 107903187-131460104  
CHR8: 109603808-128241346  
CHR8: 127925334-130546523  
CHR8: 128994839-129282422  
CHR8: 129281579-131459111  
CHR17: 34893449-34894401  
CHR17: 34901093-34901801  
CHR17: 35069218-35069594  
CHR17: 35389833-35391152

#### Tandem duplications.

CHR3: 196024713-196027587  
CHR5: 1183700-1183617

CHR6: 35862673-35874689  
CHR20: 59337857-59337772
