# Supplementary material for: Distinct patterns of somatic alterations in a lymphoblastoid and a tumor genome derived from the same individual
Source: PubMed Central journal article supplement — Nucleic Acids Res. 2011 Apr 14;39(14):6056–68. doi: 10.1093/nar/gkr221 (PMC3152357; doi:10.1093/nar/gkr221), 2011-04-14
Supplement: supp_gkr221_Additional_File_3.pdf [file supp_gkr221_Additional_File_3.pdf]

**Structural variations in HCC1954BL.** Genomic coordinates of all structural variations found in HCC1954BL genome. Genomic coordinates are indexed to the reference genome sequence NCBI 36.1 / hg18.

**Deletions.**

CHR4: 186718767 186719098

CHR18: 75555042 75555512

**Inversions.**

CHR1: 16924334 232978979

CHR4: 89066213 89077846
