# Supplementary material for: Distinct patterns of somatic alterations in a lymphoblastoid and a tumor genome derived from the same individual
Source: PubMed Central journal article supplement — Nucleic Acids Res. 2011 Apr 14;39(14):6056–68. doi: 10.1093/nar/gkr221 (PMC3152357; doi:10.1093/nar/gkr221), 2011-04-14
Supplement: supp_gkr221_Additional_File_4.pdf [file supp_gkr221_Additional_File_4.pdf]

**Point mutations in HCC1954.** Genomic coordinates are indexed to the reference genome sequence NCBI 36.1 / hg18. A.A. ref, amino acid reference; A.A. var., amino acid variant.

| CHR ID | Position  | Change | Gene name | Mutation type | A.A. ref. | A.A. var. |
|--------|-----------|--------|-----------|---------------|-----------|-----------|
| CHR1   | 152049292 | G/A    | GATAD2B   | Synonymous    | I         | I         |
| CHR1   | 194728093 | C/T    | KCNT2     | Missense      | V         | I         |
| CHR1   | 198643877 | A/G    | ZNF281    | Missense      | I         | T         |
| CHR1   | 35998793  | T/C    | CLSPN     | Missense      | H         | R         |
| CHR1   | 64919581  | C/T    | CACHD1    | Synonymous    | D         | D         |
| CHR1   | 97611752  | A/C    | DPYD      | Missense      | C         | G         |
| CHR10  | 101492936 | C/T    | CUTC      | Missense      | P         | L         |
| CHR10  | 508430    | G/A    | DIP2C     | Missense      | R         | C         |
| CHR10  | 71970891  | C/T    | KIAA1274  | Missense      | R         | W         |
| CHR11  | 111415204 | G/A    | DLAT      | Synonymous    | Q         | Q         |
| CHR11  | 111606157 | T/C    | PTS       | Synonymous    | H         | H         |
| CHR11  | 123513016 | A/G    | VWA5A     | Synonymous    | K         | K         |
| CHR11  | 18593065  | G/T    | SPTY2D1   | Synonymous    | G         | G         |
| CHR11  | 34064263  | C/T    | CAPRIN1   | Missense      | A         | V         |
| CHR11  | 36626203  | C/T    | C11ORF74  | Synonymous    | I         | I         |
| CHR11  | 6848309   | A/G    | OR10A2    | Missense      | K         | E         |
| CHR11  | 74656380  | G/C    | ARRB1     | Missense      | T         | R         |
| CHR12  | 121392038 | G/A    | CLIP1     | Nonsense      | Q         | *         |
| CHR12  | 131078547 | G/A    | EP400     | Synonymous    | L         | L         |
| CHR13  | 100062697 | T/C    | TMTC4     | Missense      | M         | V         |
| CHR14  | 22313411  | G/A    | SLC7A7    | Missense      | P         | S         |
| CHR14  | 22970484  | G/A    | MYH7      | Missense      | S         | F         |
| CHR14  | 23844107  | G/A    | C14ORF21  | Missense      | R         | Q         |
| CHR14  | 34252381  | T/C    | CFL2      | Missense      | I         | M         |
| CHR14  | 91348597  | T/C    | TC2N      | Missense      | N         | S         |
| CHR15  | 39898768  | C/T    | MAPKBP1   | Missense      | P         | L         |
| CHR15  | 43181299  | T/C    | DUOX2     | Synonymous    | G         | G         |
| CHR15  | 72829495  | G/A    | CYP1A2    | Synonymous    | Q         | Q         |
| CHR16  | 47872714  | A/C    | CBLN1     | Missense      | V         | G         |
| CHR17  | 38180200  | T/C    | VPS25     | Synonymous    | P         | P         |
| CHR17  | 52267451  | T/G    | DGKE      | Missense      | L         | R         |
| CHR17  | 55858953  | A/T    | C17ORF64  | Missense      | K         | M         |
| CHR17  | 64698971  | G/A    | ABCA10    | Missense      | T         | I         |
| CHR17  | 7519167   | T/C    | TP53      | Missense      | Y         | C         |
| CHR18  | 13671832  | C/T    | C18ORF19  | Missense      | R         | H         |
| CHR18  | 54752763  | C/T    | ZNF532    | Missense      | S         | L         |
| CHR18  | 59456160  | C/T    | SERPINB4  | Missense      | G         | S         |
| CHR18  | 59735702  | A/G    | SERPINB10 | Synonymous    | K         | K         |
| CHR19  | 16779828  | C/T    | NWD1      | Nonsense      | R         | *         |
| CHR2   | 173042234 | T/G    | ITGA6     | Missense      | C         | G         |
| CHR2   | 17765758  | G/A    | SMC6      | Missense      | A         | V         |
| CHR2   | 45493931  | T/C    | SRBD1     | Missense      | Q         | R         |
| CHR21  | 46661077  | G/C    | PCNT      | Missense      | G         | R         |
| CHR22  | 41543751  | T/C    | ARFGAP3   | Missense      | E         | G         |
| CHR3   | 187990484 | T/A    | RFC4      | Missense      | T         | S         |
| CHR5   | 114888357 | C/T    | FEM1C     | Synonymous    | Q         | Q         |
| CHR5   | 114888374 | C/T    | FEM1C     | Missense      | D         | N         |
| CHR5   | 114888458 | C/T    | FEM1C     | Missense      | D         | N         |

|       |           |     |           |            |   |   |
|-------|-----------|-----|-----------|------------|---|---|
| CHR5  | 145422211 | C/T | SH3RF2    | Synonymous | Y | Y |
| CHR5  | 96357919  | A/G | LNPEP     | Missense   | M | V |
| CHR6  | 117228537 | C/T | GPRC6A    | Missense   | G | E |
| CHR6  | 165623368 | T/C | C6ORF118  | Missense   | I | M |
| CHR6  | 2638020   | C/A | MYLK4     | Missense   | A | S |
| CHR6  | 31707884  | G/A | BAT2      | Missense   | R | H |
| CHR7  | 134952379 | A/G | NUP205    | Synonymous | V | V |
| CHR7  | 6588347   | C/T | ZDHHC4    | Missense   | P | S |
| CHR7  | 83577784  | C/T | SEMA3A    | Missense   | A | T |
| CHR9  | 118228094 | C/G | ASTN2     | Missense   | V | L |
| CHR9  | 138940038 | A/T | TRAF2     | Missense   | Q | L |
| CHRX  | 118487757 | G/A | SLC25A5   | Missense   | G | S |
| CHRX  | 134817551 | T/C | SAGE1     | Synonymous | C | C |
| CHRX  | 141119424 | C/A | MAGEC2    | Missense   | G | C |
| CHRX  | 150658776 | G/A | CNGA2     | Missense   | R | H |
| CHR11 | 14257468  | G/C | RRAS2     | Synonymous | V | V |
| CHR1  | 114225167 | A/T | BCL2L15   | UTR        | - | - |
| CHR1  | 145696829 | G/C | GJA5      | UTR        | - | - |
| CHR12 | 8557537   | G/A | CLEC4D    | UTR        | - | - |
| CHR15 | 62233989  | A/G | SNX22     | UTR        | - | - |
| CHR2  | 38831967  | T/G | SFRS7     | UTR        | - | - |
| CHR2  | 68544840  | T/C | FBXO48    | UTR        | - | - |
| CHR3  | 196959618 | C/A | MUC4      | UTR        | - | - |
| CHR4  | 178589799 | C/T | AGA       | UTR        | - | - |
| CHR6  | 101063699 | A/G | ASCC3     | UTR        | - | - |
| CHR6  | 15354630  | T/G | JARID2    | UTR        | - | - |
| CHR6  | 91353348  | C/A | MAP3K7    | UTR        | - | - |
| CHR7  | 148886687 | A/G | ZNF767    | UTR        | - | - |
| CHR8  | 133906600 | G/A | PHF20L1   | UTR        | - | - |
| CHR1  | 1108354   | A/G | TLL10     | Intronic   | - | - |
| CHR1  | 114742167 | A/G | TRIM33    | Intronic   | - | - |
| CHR1  | 151597543 | G/A | S100A9    | Intronic   | - | - |
| CHR1  | 15262372  | G/A | KIAA1026  | Intronic   | - | - |
| CHR1  | 156033225 | A/G | FCRL1     | Intronic   | - | - |
| CHR1  | 163995344 | T/A | TMCO1     | Intronic   | - | - |
| CHR1  | 167808393 | A/G | F5        | Intronic   | - | - |
| CHR1  | 190879695 | G/A | RGS13     | Intronic   | - | - |
| CHR1  | 204497298 | C/T | CTSE      | Intronic   | - | - |
| CHR1  | 205713942 | T/C | CR2       | Intronic   | - | - |
| CHR1  | 21048683  | A/G | EIF4G3    | Intronic   | - | - |
| CHR1  | 234777692 | G/A | LGALS8    | Intronic   | - | - |
| CHR1  | 42794163  | G/A | LOC728621 | Intronic   | - | - |
| CHR1  | 56958371  | T/A | Clorf168  | Intronic   | - | - |
| CHR1  | 62065674  | C/A | INADL     | Intronic   | - | - |
| CHR1  | 89347865  | G/T | GBP2      | Intronic   | - | - |
| CHR1  | 91176246  | A/T | ZNF644    | Intronic   | - | - |
| CHR10 | 101657706 | A/T | DNMBP     | Intronic   | - | - |
| CHR10 | 102286546 | C/G | HIF1AN    | Intronic   | - | - |
| CHR10 | 111627733 | C/A | XPNPEP1   | Intronic   | - | - |
| CHR10 | 115594018 | T/C | DCLRE1A   | Intronic   | - | - |
| CHR10 | 135195927 | C/A | CYP2E1    | Intronic   | - | - |
| CHR10 | 26842435  | G/A | APBB1IP   | Intronic   | - | - |
| CHR10 | 32350082  | G/A | KIF5B     | Intronic   | - | - |
| CHR10 | 45239912  | C/T | ALOX5     | Intronic   | - | - |
| CHR10 | 50627647  | C/A | OGDHL     | Intronic   | - | - |
| CHR10 | 5848287   | C/T | GDI2      | Intronic   | - | - |
| CHR10 | 6009386   | C/T | FBXO18    | Intronic   | - | - |
| CHR10 | 98797384  | G/A | SLIT1     | Intronic   | - | - |

|       |           |     |          |          |   |   |
|-------|-----------|-----|----------|----------|---|---|
| CHR11 | 107684098 | C/T | ATM      | Intronic | - | - |
| CHR11 | 131811987 | A/C | OPCML    | Intronic | - | - |
| CHR11 | 67043242  | G/A | CABP2    | Intronic | - | - |
| CHR11 | 74552550  | G/C | SLCO2B1  | Intronic | - | - |
| CHR12 | 112202673 | C/T | TPCN1    | Intronic | - | - |
| CHR12 | 38280866  | T/A | ABCD2    | Intronic | - | - |
| CHR12 | 44026961  | T/G | ANO6     | Intronic | - | - |
| CHR12 | 63165227  | A/G | TBK1     | Intronic | - | - |
| CHR13 | 102306299 | A/G | ERCC5    | Intronic | - | - |
| CHR13 | 27764428  | A/T | PAN3     | Intronic | - | - |
| CHR13 | 51945832  | A/G | CKAP2    | Intronic | - | - |
| CHR13 | 75232883  | G/A | LMO7     | Intronic | - | - |
| CHR13 | 98999210  | G/T | TM9SF2   | Intronic | - | - |
| CHR14 | 22632312  | T/G | ACIN1    | Intronic | - | - |
| CHR14 | 41437739  | A/T | LRFN5    | Intronic | - | - |
| CHR14 | 49676635  | T/C | SOS2     | Intronic | - | - |
| CHR14 | 50277732  | A/G | NIN      | Intronic | - | - |
| CHR14 | 88408257  | G/A | TTC8     | Intronic | - | - |
| CHR14 | 94644403  | G/C | DICER1   | Intronic | - | - |
| CHR14 | 94660165  | C/T | DICER1   | Intronic | - | - |
| CHR14 | 94972726  | C/T | C14orf49 | Intronic | - | - |
| CHR14 | 99898234  | T/C | WARS     | Intronic | - | - |
| CHR15 | 38853980  | G/A | DNAJC17  | Intronic | - | - |
| CHR15 | 41127827  | G/A | UBR1     | Intronic | - | - |
| CHR15 | 41835728  | T/A | PDIA3    | Intronic | - | - |
| CHR15 | 46312489  | C/T | SLC12A1  | Intronic | - | - |
| CHR15 | 51781982  | C/T | WDR72    | Intronic | - | - |
| CHR15 | 58579336  | C/A | RORA     | Intronic | - | - |
| CHR15 | 61324463  | C/T | RAB8B    | Intronic | - | - |
| CHR15 | 98842494  | G/T | LASS3    | Intronic | - | - |
| CHR16 | 2060440   | T/A | TSC2     | Intronic | - | - |
| CHR16 | 20976582  | C/T | DNAH3    | Intronic | - | - |
| CHR16 | 21005583  | G/A | DNAH3    | Intronic | - | - |
| CHR16 | 48664002  | C/T | HEATR3   | Intronic | - | - |
| CHR16 | 56066193  | G/A | DOK4     | Intronic | - | - |
| CHR16 | 56577258  | G/A | TEPP     | Intronic | - | - |
| CHR17 | 35573124  | G/T | CASC3    | Intronic | - | - |
| CHR17 | 3600698   | T/C | ITGAE    | Intronic | - | - |
| CHR17 | 39897281  | T/A | GPATCH8  | Intronic | - | - |
| CHR17 | 61062737  | C/G | CCDC46   | Intronic | - | - |
| CHR17 | 78599436  | G/A | B3GNTL1  | Intronic | - | - |
| CHR17 | 8102314   | C/T | PFAS     | Intronic | - | - |
| CHR18 | 12536608  | G/A | SPIRE1   | Intronic | - | - |
| CHR19 | 10876452  | T/C | CARM1    | Intronic | - | - |
| CHR19 | 46914182  | G/A | CEACAM5  | Intronic | - | - |
| CHR19 | 62026178  | C/A | ZIM2     | Intronic | - | - |
| CHR2  | 101240888 | A/G | C2orf29  | Intronic | - | - |
| CHR2  | 108433631 | G/A | GCC2     | Intronic | - | - |
| CHR2  | 127900314 | C/T | PROC     | Intronic | - | - |
| CHR2  | 158338816 | A/C | ACVR1    | Intronic | - | - |
| CHR2  | 178055292 | T/G | AGPS     | Intronic | - | - |
| CHR2  | 179355148 | A/C | TTN      | Intronic | - | - |
| CHR2  | 197465608 | C/T | PGAP1    | Intronic | - | - |
| CHR2  | 208927989 | G/T | PIP5K3   | Intronic | - | - |
| CHR2  | 233417533 | G/A | GIGYF2   | Intronic | - | - |
| CHR2  | 54020257  | G/A | PSME4    | Intronic | - | - |
| CHR2  | 63966685  | C/G | UGP2     | Intronic | - | - |
| CHR2  | 88205293  | C/G | FABP1    | Intronic | - | - |

|       |           |     |          |          |   |   |
|-------|-----------|-----|----------|----------|---|---|
| CHR20 | 25346690  | C/G | GIN51    | Intronic | - | - |
| CHR20 | 33760851  | G/C | RBM39    | Intronic | - | - |
| CHR20 | 36428767  | C/A | LBP      | Intronic | - | - |
| CHR20 | 48631178  | A/T | PTPN1    | Intronic | - | - |
| CHR20 | 57992758  | T/A | CDH26    | Intronic | - | - |
| CHR20 | 60860400  | C/A | NTSR1    | Intronic | - | - |
| CHR20 | 9348445   | T/A | PLCB4    | Intronic | - | - |
| CHR21 | 41761979  | C/G | TMPRSS2  | Intronic | - | - |
| CHR21 | 46361995  | C/T | COL6A2   | Intronic | - | - |
| CHR22 | 16601925  | G/T | BID      | Intronic | - | - |
| CHR22 | 25076912  | G/A | SEZ6L    | Intronic | - | - |
| CHR3  | 122821717 | G/A | FBXO40   | Intronic | - | - |
| CHR3  | 132367131 | G/T | NEK11    | Intronic | - | - |
| CHR3  | 15286208  | C/A | SH3BP5   | Intronic | - | - |
| CHR3  | 166241611 | C/A | SI       | Intronic | - | - |
| CHR3  | 168665510 | A/G | SERPINI2 | Intronic | - | - |
| CHR3  | 168665520 | A/G | SERPINI2 | Intronic | - | - |
| CHR3  | 180530238 | T/C | ZNF639   | Intronic | - | - |
| CHR3  | 198134458 | A/T | SENP5    | Intronic | - | - |
| CHR3  | 199031805 | G/A | LRCH3    | Intronic | - | - |
| CHR3  | 48240275  | C/T | CAMP     | Intronic | - | - |
| CHR3  | 48613666  | A/G | UQCRC1   | Intronic | - | - |
| CHR3  | 95254655  | G/T | ARL13B   | Intronic | - | - |
| CHR4  | 100419515 | T/G | ADH1A    | Intronic | - | - |
| CHR4  | 110907048 | A/T | CFI      | Intronic | - | - |
| CHR4  | 119869512 | G/A | SEC24D   | Intronic | - | - |
| CHR4  | 1674851   | G/A | SLBP     | Intronic | - | - |
| CHR4  | 185860023 | C/A | MLF1IP   | Intronic | - | - |
| CHR4  | 45762094  | G/T | GABRG1   | Intronic | - | - |
| CHR4  | 74236163  | T/A | ANKRD17  | Intronic | - | - |
| CHR5  | 10434802  | A/T | MARCH6   | Intronic | - | - |
| CHR5  | 112192242 | C/A | APC      | Intronic | - | - |
| CHR5  | 112192302 | C/A | APC      | Intronic | - | - |
| CHR5  | 112192356 | C/G | APC      | Intronic | - | - |
| CHR5  | 114906374 | C/T | FEM1C    | Intronic | - | - |
| CHR5  | 114906413 | C/T | FEM1C    | Intronic | - | - |
| CHR5  | 114906490 | C/T | FEM1C    | Intronic | - | - |
| CHR5  | 115179536 | G/A | CDO1     | Intronic | - | - |
| CHR5  | 13830280  | T/C | DNAH5    | Intronic | - | - |
| CHR5  | 13846575  | A/C | DNAH5    | Intronic | - | - |
| CHR5  | 176604192 | C/T | NSD1     | Intronic | - | - |
| CHR5  | 176604226 | C/A | NSD1     | Intronic | - | - |
| CHR5  | 176604250 | C/A | NSD1     | Intronic | - | - |
| CHR5  | 176606737 | C/T | NSD1     | Intronic | - | - |
| CHR5  | 35682930  | G/A | SPEF2    | Intronic | - | - |
| CHR5  | 41237587  | G/C | C6       | Intronic | - | - |
| CHR5  | 71552741  | A/G | MRPS27   | Intronic | - | - |
| CHR6  | 112616635 | A/T | LAMA4    | Intronic | - | - |
| CHR6  | 139155292 | C/T | CCDC28A  | Intronic | - | - |
| CHR6  | 145071208 | G/A | UTRN     | Intronic | - | - |
| CHR6  | 147674367 | A/C | STXBP5   | Intronic | - | - |
| CHR6  | 167267359 | T/G | RNASET2  | Intronic | - | - |
| CHR6  | 167366354 | G/A | FGFR1OP  | Intronic | - | - |
| CHR6  | 169860066 | A/T | PHF10    | Intronic | - | - |
| CHR6  | 24396615  | G/T | DCDC2    | Intronic | - | - |
| CHR6  | 30232669  | T/G | TRIM10   | Intronic | - | - |
| CHR6  | 34497480  | C/G | RPS10    | Intronic | - | - |
| CHR6  | 38758299  | A/T | GLO1     | Intronic | - | - |

|       |           |     |          |            |   |   |
|-------|-----------|-----|----------|------------|---|---|
| CHR6  | 42682657  | T/C | UBR2     | Intronic   | - | - |
| CHR6  | 49933123  | A/C | CRISP1   | Intronic   | - | - |
| CHR6  | 52957451  | T/A | GSTA4    | Intronic   | - | - |
| CHR6  | 71521383  | A/T | SMAP1    | Intronic   | - | - |
| CHR6  | 79754893  | G/A | PHIP     | Intronic   | - | - |
| CHR6  | 79770317  | T/C | PHIP     | Intronic   | - | - |
| CHR7  | 107493853 | T/C | LAMB4    | Intronic   | - | - |
| CHR7  | 117030330 | C/T | CFTR     | Intronic   | - | - |
| CHR7  | 117092925 | G/A | CFTR     | Intronic   | - | - |
| CHR7  | 128442670 | A/T | TNPO3    | Intronic   | - | - |
| CHR7  | 136934922 | C/T | DGKI     | Intronic   | - | - |
| CHR7  | 16871364  | G/A | AGR3     | Intronic   | - | - |
| CHR7  | 33913109  | T/A | BMPER    | Intronic   | - | - |
| CHR7  | 90423157  | A/C | PFTK1    | Intronic   | - | - |
| CHR8  | 108428304 | T/A | ANGPT1   | Intronic   | - | - |
| CHR8  | 109070375 | A/T | RSPO2    | Intronic   | - | - |
| CHR8  | 133886467 | C/G | PHF20L1  | Intronic   | - | - |
| CHR8  | 144621455 | C/T | ZC3H3    | Intronic   | - | - |
| CHR8  | 72346947  | C/T | EYA1     | Intronic   | - | - |
| CHR8  | 87462376  | G/T | WWP1     | Intronic   | - | - |
| CHR8  | 97961147  | A/C | PGCP     | Intronic   | - | - |
| CHR9  | 103071848 | G/A | PRG-3    | Intronic   | - | - |
| CHR9  | 128871247 | T/C | RALGPS1  | Intronic   | - | - |
| CHR9  | 20708068  | C/G | KIAA1797 | Intronic   | - | - |
| CHRX  | 134817780 | T/G | SAGE1    | Intronic   | - | - |
| CHRX  | 151785280 | A/G | NSDHL    | Intronic   | - | - |
| CHRX  | 15506104  | C/G | ACE2     | Intronic   | - | - |
| CHRX  | 17002427  | C/T | REPS2    | Intronic   | - | - |
| CHRX  | 54856729  | T/G | MAGED2   | Intronic   | - | - |
| CHRX  | 55064545  | C/T | ALAS2    | Intronic   | - | - |
| CHRX  | 64056549  | C/T | KIAA1166 | Intronic   | - | - |
| CHRX  | 72713930  | C/T | CHIC1    | Intronic   | - | - |
| CHRX  | 84449628  | A/G | POF1B    | Intronic   | - | - |
| CHRX  | 86763669  | G/A | KLHL4    | Intronic   | - | - |
| CHR12 | 43745237  | C/T | RACGAP1P | ncRNA      | - | - |
| CHR1  | 121185964 | A/G | -        | Intergenic | - | - |
| CHR1  | 57301249  | C/T | -        | Intergenic | - | - |
| CHR10 | 127957377 | T/G | -        | Intergenic | - | - |
| CHR11 | 86624972  | T/A | -        | Intergenic | - | - |
| CHR14 | 20568496  | C/T | -        | Intergenic | - | - |
| CHR17 | 52961747  | G/A | -        | Intergenic | - | - |
| CHR2  | 140809431 | C/A | -        | Intergenic | - | - |
| CHR2  | 162071311 | C/T | -        | Intergenic | - | - |
| CHR2  | 97058621  | A/G | -        | Intergenic | - | - |
| CHR20 | 158610    | C/A | -        | Intergenic | - | - |
| CHR21 | 30786400  | T/G | -        | Intergenic | - | - |
| CHR5  | 114876291 | G/C | -        | Intergenic | - | - |
| CHR5  | 114876356 | G/A | -        | Intergenic | - | - |
| CHR7  | 92192839  | A/G | -        | Intergenic | - | - |
| CHRX  | 32969262  | C/A | -        | Intergenic | - | - |
| CHRX  | 52908031  | G/A | -        | Intergenic | - | - |
| CHRX  | 52908104  | C/G | -        | Intergenic | - | - |
