# Supplementary material for: Distinct patterns of somatic alterations in a lymphoblastoid and a tumor genome derived from the same individual
Source: PubMed Central journal article supplement — Nucleic Acids Res. 2011 Apr 14;39(14):6056–68. doi: 10.1093/nar/gkr221 (PMC3152357; doi:10.1093/nar/gkr221), 2011-04-14
Supplement: supp_gkr221_Additional_File_5.pdf [file supp_gkr221_Additional_File_5.pdf]

Point mutations in HCC1954BL. Genomic coordinates are indexed to the reference genome sequence NCBI 36.1 / hg18. A.A. ref, amino acid reference; A.A. var., amino acid variant.

| CHR ID | Position  | Change | Gene name | Mutation type | A.A. ref. | A.A. var. |
|--------|-----------|--------|-----------|---------------|-----------|-----------|
| CHR1   | 109686214 | A/G    | SORT1     | Synonymous    | Y         | Y         |
| CHR1   | 155220820 | T/C    | ARHGEF11  | Missense      | D         | G         |
| CHR1   | 156003894 | T/A    | FCRL2     | Missense      | R         | W         |
| CHR1   | 157433410 | C/G    | CADM3     | Synonymous    | T         | T         |
| CHR1   | 206319363 | G/A    | PLXNA2    | Synonymous    | A         | A         |
| CHR1   | 870881    | A/G    | NOC2L     | Missense      | F         | L         |
| CHR11  | 120925965 | C/G    | SORL1     | Missense      | P         | R         |
| CHR11  | 4659812   | C/A    | OR51E2    | Missense      | A         | S         |
| CHR11  | 59237022  | A/G    | OR10V1    | Synonymous    | Y         | Y         |
| CHR11  | 6870019   | A/G    | OR2D2     | Missense      | C         | R         |
| CHR12  | 104117284 | C/T    | APPL2     | Missense      | R         | K         |
| CHR12  | 56398423  | G/A    | OS9       | Synonymous    | S         | S         |
| CHR15  | 47446998  | C/G    | C15ORF33  | Missense      | A         | P         |
| CHR16  | 86424113  | A/G    | SLC7A5    | Synonymous    | C         | C         |
| CHR17  | 31349458  | C/T    | CCL15     | Synonymous    | T         | T         |
| CHR17  | 42554849  | A/G    | CDC27     | Synonymous    | L         | L         |
| CHR17  | 45808135  | T/A    | EME1      | Missense      | N         | K         |
| CHR17  | 45969111  | T/C    | EPN3      | Synonymous    | N         | N         |
| CHR19  | 46501943  | C/A    | HNRNPUL1  | Missense      | S         | R         |
| CHR2   | 11719749  | G/A    | NTSR2     | Synonymous    | S         | S         |
| CHR3   | 47073875  | G/A    | SETD2     | Nonsense      | Q         | *         |
| CHR3   | 89472813  | C/A    | EPHA3     | Missense      | P         | Q         |
| CHR9   | 115969808 | G/A    | COL27A1   | Missense      | R         | Q         |
| CHR9   | 130748514 | C/T    | DOLK      | Missense      | R         | H         |
| CHR1   | 100961236 | C/A    | VCAM1     | Nonsense      | S         | *         |
| CHR9   | 134063509 | C/T    | NTNG2     | Synonymous    | R         | R         |
| CHR9   | 137859124 | C/T    | CAMSAP1   | Synonymous    | P         | P         |
| CHR9   | 19510939  | C/A    | SLC24A2   | Missense      | M         | I         |
| CHR4   | 106375929 | C/T    | TET2      | Nonsense      | Q         | *         |
| CHRX   | 152949611 | C/T    | MECP2     | Missense      | V         | M         |
| CHR1   | 11840208  | A/T    | NPPB      | UTR           | -         | -         |
| CHR1   | 240225952 | T/C    | MAP1LC3C  | UTR           | -         | -         |
| CHR14  | 102877348 | T/C    | EIF5      | UTR           | -         | -         |
| CHR16  | 55848271  | T/C    | PLLP      | UTR           | -         | -         |
| CHR17  | 38216226  | C/T    | CNTD1     | UTR           | -         | -         |
| CHR19  | 59804108  | G/A    | LILRA1    | UTR           | -         | -         |
| CHR2   | 162936263 | T/G    | KCNH7     | UTR           | -         | -         |
| CHR2   | 204308025 | A/G    | CD28      | UTR           | -         | -         |
| CHR3   | 49290604  | C/T    | USP4      | UTR           | -         | -         |
| CHR6   | 134415360 | C/T    | SLC2A12   | UTR           | -         | -         |
| CHR6   | 26266758  | C/T    | HIST1H2BD | UTR           | -         | -         |
| CHR7   | 141276170 | T/G    | CLEC5A    | UTR           | -         | -         |
| CHR9   | 102378761 | T/A    | TMEFF1    | UTR           | -         | -         |
| CHR1   | 100444126 | C/T    | DBT       | Intronic      | -         | -         |
| CHR1   | 151875529 | A/T    | Clorf77   | Intronic      | -         | -         |
| CHR1   | 168189500 | C/T    | KIFAP3    | Intronic      | -         | -         |
| CHR1   | 184381737 | A/G    | HMCN1     | Intronic      | -         | -         |
| CHR1   | 194725359 | T/C    | KCNT2     | Intronic      | -         | -         |
| CHR1   | 205175155 | T/C    | PIGR      | Intronic      | -         | -         |
| CHR1   | 205719684 | A/G    | CR2       | Intronic      | -         | -         |
| CHR1   | 220934542 | C/T    | AIDA      | Intronic      | -         | -         |
| CHR1   | 27822688  | C/T    | FGR       | Intronic      | -         | -         |

|       |           |     |          |          |   |   |
|-------|-----------|-----|----------|----------|---|---|
| CHR1  | 47274485  | T/C | CYP4X1   | Intronic | - | - |
| CHR1  | 52624317  | G/A | ORC1L    | Intronic | - | - |
| CHR1  | 53372313  | C/T | SLC1A7   | Intronic | - | - |
| CHR1  | 56762310  | T/C | PPAP2B   | Intronic | - | - |
| CHR1  | 64471088  | T/A | UBE2U    | Intronic | - | - |
| CHR1  | 99966548  | C/A | FRRS1    | Intronic | - | - |
| CHR10 | 114166517 | G/C | ACSL5    | Intronic | - | - |
| CHR10 | 122654557 | C/T | BRWD2    | Intronic | - | - |
| CHR10 | 20492945  | T/A | PLXDC2   | Intronic | - | - |
| CHR10 | 26548524  | G/T | GAD2     | Intronic | - | - |
| CHR10 | 29855728  | G/A | SVIL     | Intronic | - | - |
| CHR10 | 61489092  | A/T | ANK3     | Intronic | - | - |
| CHR10 | 74741801  | T/C | TTC18    | Intronic | - | - |
| CHR10 | 94378821  | G/A | KIF11    | Intronic | - | - |
| CHR11 | 102168983 | T/G | MMP1     | Intronic | - | - |
| CHR11 | 71986429  | C/T | PDE2A    | Intronic | - | - |
| CHR11 | 9007824   | C/T | SCUBE2   | Intronic | - | - |
| CHR12 | 102673819 | G/A | STAB2    | Intronic | - | - |
| CHR12 | 108012401 | C/A | ALKBH2   | Intronic | - | - |
| CHR12 | 3636106   | C/T | EFCAB4B  | Intronic | - | - |
| CHR12 | 57558853  | A/C | LRIG3    | Intronic | - | - |
| CHR12 | 8695369   | A/T | MFAP5    | Intronic | - | - |
| CHR13 | 40544771  | A/G | WBP4     | Intronic | - | - |
| CHR13 | 44739340  | T/C | GTF2F2   | Intronic | - | - |
| CHR13 | 69212959  | A/C | KLHL1    | Intronic | - | - |
| CHR15 | 46381241  | G/C | SLC12A1  | Intronic | - | - |
| CHR15 | 87824327  | C/A | RHCG     | Intronic | - | - |
| CHR16 | 8918893   | C/T | USP7     | Intronic | - | - |
| CHR17 | 26277785  | G/A | ADAP2    | Intronic | - | - |
| CHR17 | 31091751  | C/A | RASL10B  | Intronic | - | - |
| CHR17 | 38313441  | A/G | G6PC     | Intronic | - | - |
| CHR17 | 38923169  | A/G | DHX8     | Intronic | - | - |
| CHR17 | 40292732  | G/A | EFTUD2   | Intronic | - | - |
| CHR17 | 43375541  | A/G | PNPO     | Intronic | - | - |
| CHR17 | 46403305  | C/T | SPAG9    | Intronic | - | - |
| CHR17 | 68705185  | C/T | COG1     | Intronic | - | - |
| CHR17 | 70357881  | G/T | GRIN2C   | Intronic | - | - |
| CHR18 | 17672505  | A/G | MIB1     | Intronic | - | - |
| CHR19 | 14925638  | G/T | SLC1A6   | Intronic | - | - |
| CHR19 | 15508996  | C/T | CYP4F22  | Intronic | - | - |
| CHR19 | 16406373  | G/A | EPS15L1  | Intronic | - | - |
| CHR19 | 17223659  | C/T | USHBP1   | Intronic | - | - |
| CHR19 | 17515475  | A/G | FAM129C  | Intronic | - | - |
| CHR19 | 17692573  | C/G | MAP1S    | Intronic | - | - |
| CHR19 | 42781034  | T/C | ZNF540   | Intronic | - | - |
| CHR19 | 45934994  | C/G | ITPKC    | Intronic | - | - |
| CHR19 | 6793778   | G/A | VAV1     | Intronic | - | - |
| CHR2  | 100947572 | A/G | NPAS2    | Intronic | - | - |
| CHR2  | 118470263 | G/A | CCDC93   | Intronic | - | - |
| CHR2  | 233543050 | A/G | NGEF     | Intronic | - | - |
| CHR2  | 238911502 | A/G | TRAF3IP1 | Intronic | - | - |
| CHR2  | 239019654 | G/A | ASB1     | Intronic | - | - |
| CHR2  | 32674045  | T/C | BIRC6    | Intronic | - | - |
| CHR2  | 99418647  | A/T | REV1     | Intronic | - | - |
| CHR20 | 2946764   | G/A | PTPRA    | Intronic | - | - |
| CHR20 | 43944530  | G/A | ZSWIM1   | Intronic | - | - |
| CHR21 | 37020090  | C/G | SIM2     | Intronic | - | - |
| CHR22 | 24404773  | A/G | ADRBK2   | Intronic | - | - |
| CHR22 | 28262956  | A/G | THOC5    | Intronic | - | - |
| CHR3  | 10063089  | A/C | FANCD2   | Intronic | - | - |
| CHR3  | 10063099  | T/A | FANCD2   | Intronic | - | - |

|       |           |     |          |            |   |   |
|-------|-----------|-----|----------|------------|---|---|
| CHR3  | 102534520 | C/G | SENP7    | Intronic   | - | - |
| CHR3  | 110172572 | A/G | MORC1    | Intronic   | - | - |
| CHR3  | 120927958 | C/T | C3orf15  | Intronic   | - | - |
| CHR3  | 120931481 | C/T | C3orf15  | Intronic   | - | - |
| CHR3  | 140585321 | T/C | COPB2    | Intronic   | - | - |
| CHR3  | 196504444 | T/C | ACAP2    | Intronic   | - | - |
| CHR3  | 197451219 | G/A | PCYT1A   | Intronic   | - | - |
| CHR3  | 48311527  | G/A | NME6     | Intronic   | - | - |
| CHR3  | 5224236   | G/T | EDEM1    | Intronic   | - | - |
| CHR3  | 58246417  | G/A | ABHD6    | Intronic   | - | - |
| CHR3  | 65400544  | T/C | MAGI1    | Intronic   | - | - |
| CHR4  | 100697518 | C/T | RG9MTD2  | Intronic   | - | - |
| CHR4  | 162796765 | A/C | FSTL5    | Intronic   | - | - |
| CHR4  | 162916713 | A/G | FSTL5    | Intronic   | - | - |
| CHR4  | 171223917 | T/A | AADAT    | Intronic   | - | - |
| CHR4  | 2910959   | C/T | NOL14    | Intronic   | - | - |
| CHR4  | 42161129  | T/C | ATP8A1   | Intronic   | - | - |
| CHR4  | 71746905  | T/C | IGJ      | Intronic   | - | - |
| CHR4  | 76634729  | T/A | RCHY1    | Intronic   | - | - |
| CHR5  | 179225015 | C/T | TBC1D9B  | Intronic   | - | - |
| CHR5  | 35685080  | A/T | SPEF2    | Intronic   | - | - |
| CHR6  | 152749598 | C/T | SYNE1    | Intronic   | - | - |
| CHR6  | 159048197 | T/G | SYTL3    | Intronic   | - | - |
| CHR6  | 24513046  | T/C | MRS2     | Intronic   | - | - |
| CHR6  | 28373936  | A/G | PGBD1    | Intronic   | - | - |
| CHR6  | 2838534   | G/A | SERPINB9 | Intronic   | - | - |
| CHR6  | 32445876  | T/C | C6orf10  | Intronic   | - | - |
| CHR6  | 34104127  | G/A | GRM4     | Intronic   | - | - |
| CHR6  | 47104397  | C/A | GPR110   | Intronic   | - | - |
| CHR6  | 76656270  | C/G | MYO6     | Intronic   | - | - |
| CHR6  | 8359698   | C/A | SLC35B3  | Intronic   | - | - |
| CHR6  | 90462465  | T/C | MDN1     | Intronic   | - | - |
| CHR7  | 127039147 | C/G | PAX4     | Intronic   | - | - |
| CHR7  | 45107262  | G/T | TBRG4    | Intronic   | - | - |
| CHR7  | 98846886  | G/C | BUD31    | Intronic   | - | - |
| CHR8  | 101698972 | A/G | SNX31    | Intronic   | - | - |
| CHR8  | 68334446  | G/A | ARFGEF1  | Intronic   | - | - |
| CHR8  | 68341794  | A/T | ARFGEF1  | Intronic   | - | - |
| CHR8  | 87516459  | G/A | WWP1     | Intronic   | - | - |
| CHR8  | 87725480  | G/A | CNGB3    | Intronic   | - | - |
| CHR9  | 19314223  | A/G | DENND4C  | Intronic   | - | - |
| CHRX  | 39796601  | C/A | BCOR     | Intronic   | - | - |
| CHRX  | 54061192  | T/A | PHF8     | Intronic   | - | - |
| CHRX  | 8953434   | A/T | FAM9B    | Intronic   | - | - |
| CHR2  | 201432953 | C/A | CLK1     | ncRNA      | - | - |
| CHR8  | 67842645  | G/A | PTTG3P   | ncRNA      | - | - |
| CHR1  | 246751390 | G/A | -        | Intergenic | - | - |
| CHR12 | 102505044 | G/T | -        | Intergenic | - | - |
| CHR12 | 106817428 | A/C | -        | Intergenic | - | - |
| CHR17 | 25054530  | A/G | -        | Intergenic | - | - |
| CHR17 | 68858402  | C/T | -        | Intergenic | - | - |
| CHR19 | 58983175  | G/C | -        | Intergenic | - | - |
| CHR2  | 116288872 | T/G | -        | Intergenic | - | - |
| CHR2  | 141397474 | C/T | -        | Intergenic | - | - |
| CHR3  | 169026075 | A/C | -        | Intergenic | - | - |
| CHR3  | 192419063 | G/A | -        | Intergenic | - | - |
| CHR4  | 98981117  | A/T | -        | Intergenic | - | - |
| CHR6  | 169923581 | G/A | -        | Intergenic | - | - |
| CHR7  | 37250299  | G/A | -        | Intergenic | - | - |
| CHR8  | 68060106  | T/G | -        | Intergenic | - | - |
